# Supplementary material for: A scoping review of sources of mercury and its health effects among Pakistan’s most vulnerable population
Source: publisher site journal article supplement (doi:10.1515/reveh-2019-0099), 2020-08-21
Supplement: Supplementary file 1 [file j_reveh-2019-0099_suppl.docx]

**Appendix A. Supplementary data**

**Table 1. Samples details factsheet (Water and Sediments at Gilgit River)**

| **S.No** | **Sample Site Name** | **Sample No** | **Latitude** | **Longitude** | **Altitude**  **(ft)** | **Temperature**  **(Celsius)** | **PH** | **Recent climatologically conditions (e.g. Sunshine(Clear Weather), Rainfall, Snow cover)** | **Date & Time of Sampling** |
| --- | --- | --- | --- | --- | --- | --- | --- | --- | --- |
| 1 | Danyor, Old China Bridge- Gilgit River, GB | 1 | 35.89945 | 74.39873 | 4498 | 18 | 8.4 | Full Sunshine | 26th July 2017  09:45 AM |
| 2 | Danyor, Old China Bridge- Gilgit River, GB | 2 | 35.89933 | 74.39878 | 4490 | 10 | 9.1 | Full Sunshine | 26th July 2017  10:05 AM |
| 3 | Danyor, Old China Bridge- Gilgit River, GB | 3 | 35.89948 | 74.39897 | 4438 | 19 | 8.2 | Full Sunshine | 26th July 2017  10:20 AM |
| 4 | Danyor, Old China Bridge- Gilgit River, GB | 4 | 35.89858 | 74.39783 | 4766 | 10 | 8.6 | Full Sunshine | 26th July 2017  10:30 AM |
| 5 | Danyor, Old China Bridge- Gilgit River, GB | 5 | 35.8992 | 74.39913 | 4553 | 20 | 8 | Full Sunshine | 26th July 2017  10:35 AM |
| 6 | Danyor, Old China Bridge- Gilgit River, GB | 6 | 35.89869 | 74.39896 | 4250 | 10 | 8.4 | Full Sunshine | 26th July 2017  10:45 AM |
| 7 | Danyor, Old China Bridge- Gilgit River, GB | 7 | 35.89905 | 74.39943 | 4696 | 20 | 8.2 | Full Sunshine | 26th July 2017  10:50 AM |
| 8 | Danyor, Old China Bridge- Gilgit River, GB | 8 | 35.89918 | 74.39958 | 4571 | 10 | 8.4 | Full Sunshine | 26th July 2017  10:55 AM |
| 9 | Danyor, Old China Bridge- Gilgit River, GB | 9 | 35.89924 | 74.40019 | 4491 | 20 | 8 | Full Sunshine | 26th July 2017  11:00 AM |
| 10 | Danyor, Old China Bridge- Gilgit River, GB | 10 | 35.89916 | 74.40034 | 4483 | 10 | 8.4 | Full Sunshine | 26th July 2017  11:05 AM |
| 11 | Danyor, Old China Bridge- Gilgit River, GB | 11 | 35.89926 | 74.40075 | 4485 | 12 | 8 | Full Sunshine | 26th July 2017  11:10 AM |
| 12 | Danyor, Old China Bridge- Gilgit River, GB | 12 | 35.89928 | 74.40088 | 4483 | 10 | 8 | Full Sunshine | 26th July 2017  11:15 AM |

**Sample Details**

**Sample Site Name:** Danyor, Old China Bridge- Gilgit River, GB **Sample No**: 1

1. Distance from Panning Site 0 Meter

2. Distance from River Bank 10 Meters (spring +river Water)

3. Distance from other Sample points 10 Meters

**Sample Site Name:** Danyor, Old China Bridge- Gilgit River, GB **Sample No**: 2

1. Distance from Panning Site 0 Meter

2. Distance from River Bank 0 Meter (Only River Water)

3. Distance from other Sample points 10 Meters

**Sample Site Name:** Danyor, Old China Bridge- Gilgit River, GB **Sample No**: 3

1. Distance from Panning Site 0 Meter

2. Distance from River Bank 15 Meters (spring +river Water)

3. Distance from other Sample points 10 Meters from Sample No 1

**Sample Site Name:** Danyor, Old China Bridge- Gilgit River, GB **Sample No**: 4

1. Distance from Panning Site 0 Meter

2. Distance from River Bank 0 Meter (Only River)

3. Distance from other Sample points 40 Meters from Sample No 2

**Sample Site Name:** Danyor, Old China Bridge- Gilgit River, GB **Sample No**: 5

1. Distance from Panning Site 0 Meter

2. Distance from River Bank 30 Meters (River + Spring Water)

3. Distance from other Sample points 25 Meters from Sample 3

**Sample Site Name:** Danyor, Old China Bridge- Gilgit River, GB **Sample No**: 6

1. Distance from Panning Site 0 Meter

2. Distance from River Bank 0 Meter (Only River)

3. Distance from other Sample points 30 Meters from Sample 4

**Sample Site Name:** Danyor, Old China Bridge- Gilgit River, GB **Sample No**: 7

1. Distance from Panning Site 0 Meter

2. Distance from River Bank 13 Meters (spring + River Water)

3. Distance from other Sample points 33 Meters from sample 5

**Sample Site Name:** Danyor, Old China Bridge- Gilgit River, GB **Sample No**: 8

1. Distance from Panning Site 0 Meter

2. Distance from River Bank 0 Meter (River Bank)

3. Distance from other Sample points 30 Meters from sample 6

**Sample Site Name:** Danyor, Old China Bridge- Gilgit River, GB **Sample No**: 9

1. Distance from Panning Site 0 Meter

2. Distance from River Bank 20 Meters (River + Spring Water)

3. Distance from other Sample points 17 Meters from Sample 7

**Sample Site Name:** Danyor, Old China Bridge- Gilgit River, GB **Sample No**: 10

1. Distance from Panning Site 0 Meter

2. Distance from River Bank 0 Meter (Only River)

3. Distance from other Sample points 21 Meters from Sample 8

**Sample Site Name:** Danyor, Old China Bridge- Gilgit River, GB **Sample No**: 11

1. Distance from Panning Site 0 Meter

2. Distance from River Bank 23 Meters (River + Spring Water)

3. Distance from other Sample points 47 Meters from Sample 9

**Sample Site Name:** Danyor, Old China Bridge- Gilgit River, GB **Sample No**: 12

1. Distance from Panning Site 0 Meter

2. Distance from River Bank 0 Meter (Only River)

3. Distance from other Sample points 42 Meters from Sample 10

**Table 2. Samples details factsheet (Water and Sediments at Hunza River)**

| **S.N** | **Sample Site Name** | **Sample No** | **Latitude** | **Longitude** | **Altitude (ft)** | **Temperature**  **(Celcius)** | **PH** | **Recent climatologically conditions (e.g. Sunshine (Clear Weather), Rainfall, Snow cover)** | **Date & Time of Sampling** |
| --- | --- | --- | --- | --- | --- | --- | --- | --- | --- |
| 1 | Opposite to Nomal Village, Adjacent to KKH- Hunza River, GB | 1 | 36.08044 | 74.29435 | 5160 | 8 | 8.2 | Full Sunshine | 26th July 2017  12:10 PM |
| 2 | Opposite to Nomal Village, Adjacent to KKH- Hunza River, GB | 2 | 36.08043 | 74.29434 | 5163 | 8 | 8.2 | Full Sunshine | 26th July 2017  12:15 PM |
| 3 | Opposite to Nomal Village, Adjacent to KKH- Hunza River, GB | 3 | 36.08016 | 74.29397 | 4982 | 7 | 8.7 | Full Sunshine | 26th July 2017  12:20 PM |
| 4 | Opposite to Nomal Village, Adjacent to KKH- Hunza River, GB | 4 | 36.07994 | 74.29397 | 5007 | 8 | 8.7 | Full Sunshine | 26th July 2017  12:23 PM |
| 5 | Opposite to Nomal Village, Adjacent to KKH- Hunza River, GB | 5 | 36.08016 | 74.29401 | 4987 | 8 | 8.7 | Full Sunshine | 26th July 2017  12:26 PM |
| 6 | Opposite to Nomal Village, Adjacent to KKH- Hunza River, GB | 6 | 36.08016 | 74.29401 | 4987 | 8 | 8.8 | Full Sunshine | 26th July 2017  12:30 PM |
| 7 | Opposite to Nomal Village, Adjacent to KKH- Hunza River, GB | 7 | 36.07922 | 74.29381 | 4980 | 8 | 8.7 | Full Sunshine | 26th July 2017  12:36 PM |
| 8 | Opposite to Nomal Village, Adjacent to KKH- Hunza River, GB | 8 | 36.07982 | 74.29394 | 5049 | 8 | 8.6 | Full Sunshine | 26th July 2017  12:40 PM |
| 9 | Opposite to Nomal Village, Adjacent to KKH- Hunza River, GB | 9 | 36.07891 | 74.2948 | 4984 | 8 | 8.5 | Full Sunshine | 26th July 2017  12:44 PM |
| 10 | Opposite to Nomal Village, Adjacent to KKH- Hunza River, GB | 10 | 36.07822 | 74.29402 | 5048 | 8 | 8.7 | Full Sunshine | 26th July 2017  12:49 PM |
| 11 | Opposite to Nomal Village, Adjacent to KKH- Hunza River, GB | 11 | 36.07793 | 74.29402 | 5022 | 6 | 8.7 | Full Sunshine | 26th July 2017  12:55 PM |
| 12 | Opposite to Nomal Village, Adjacent to KKH- Hunza River, GB | 12 | 36.07792 | 74.29395 | 5044 | 7 | 8.6 | Full Sunshine | 26th July 2017  01:02 PM |
| 13 | Opposite to Nomal Village, Adjacent to KKH- Hunza River, GB | 13 | 36.07713 | 74.29391 | 5022 | 8 | 8.6 | Full Sunshine | 26th July 2017  01:10 PM |

**Sample Details**

**Sample Site Name:** Opposite to Nomal Village, Adjacent to KKH- Hunza River, GB **Sample No**: 1

1. Distance from Panning Site 150 Meters (Upstream before Panning Site)

2. Distance from River Bank 3 Meters

3. Distance from other Sample points 29 Meters

**Sample Site Name:** Opposite to Nomal Village, Adjacent to KKH- Hunza River, GB **Sample No**: 2

1. Distance from Panning Site 121 Meters (Upstream before Panning Site)

2. Distance from River Bank 4 Meters

3. Distance from other Sample points 29 Meters

**Sample Site Name:** Opposite to Nomal Village, Adjacent to KKH- Hunza River, GB **Sample No**: 3

1. Distance from Panning Site 102 Meters (Upstream before Panning Site)

2. Distance from River Bank 2.5 Meters

3. Distance from other Sample points 19 Meters

**Sample Site Name:** Opposite to Nomal Village, Adjacent to KKH- Hunza River, GB **Sample No**: 4

1. Distance from Panning Site 87 Meters (Upstream before Panning Site)

2. Distance from River Bank 2 Meters

3. Distance from other Sample points 15 Meters

**Sample Site Name:** Opposite to Nomal Village, Adjacent to KKH- Hunza River, GB **Sample No**: 5

1. Distance from Panning Site 77 Meters (Upstream before Panning Site)

2. Distance from River Bank 3.5 Meters

3. Distance from other Sample points 10 Meters

**Sample Site Name:** Opposite to Nomal Village, Adjacent to KKH- Hunza River, GB **Sample No**: 6

1. Distance from Panning Site 64 Meters (Upstream before Panning Site)

2. Distance from River Bank 4 Meters

3. Distance from other Sample points 13 Meters

**Sample Site Name:** Opposite to Nomal Village, Adjacent to KKH- Hunza River, GB **Sample No**:7

1. Distance from Panning Site 47 Meters (Upstream before Panning Site)

2. Distance from River Bank 1.5 Meters (For Water), 1.1 Meters (For Sediments)

3. Distance from other Sample points 17 Meters

**Sample Site Name:** Opposite to Nomal Village, Adjacent to KKH- Hunza River, GB **Sample No**: 8

1. Distance from Panning Site 37 Meters (Upstream before Panning Site)

2. Distance from River Bank 1 Meter

3. Distance from other Sample points 10 Meter

**Sample Site Name:** Opposite to Nomal Village, Adjacent to KKH- Hunza River, GB **Sample No**: 9

1. Distance from Panning Site 2 Meters (Near Panning Sites)

2. Distance from River Bank 2 Meters (For Sediments) 2.5 Meters (For Water)

3. Distance from other Sample points 35 Meters

**Sample Site Name:** Opposite to Nomal Village, Adjacent to KKH- Hunza River, GB **Sample No**: 10

1. Distance from Panning Site + 23 Meters (+ Down Stream after Panning Site)

2. Distance from River Bank 1.3 Meter (For Sediments) 1.1 Meters (For Water)

3. Distance from other Sample points 21 Meters

**Sample Site Name:** Opposite to Nomal Village, Adjacent to KKH- Hunza River, GB **Sample No**: 11

1. Distance from Panning Site +66 Meters

2. Distance from River Bank 2.1 Meters (For Sediments) 2.7 Meters (For Water)

3. Distance from other Sample points 43 Meters

**Sample Site Name:** Opposite to Nomal Village, Adjacent to KKH- Hunza River, GB **Sample No**: 12

1. Distance from Panning Site +118 Meters

2. Distance from River Bank 1.1 Meters (For Sediments) 1.3 Meters (For Water)

3. Distance from other Sample points 52 Meters

**Sample Site Name:** Opposite to Nomal Village, Adjacent to KKH- Hunza River, GB **Sample No**: 13

1. Distance from Panning Site +145 Meters

2. Distance from River Bank 0.7 Meter (For Sediments) 1 Meter (For Water)

3. Distance from other Sample points 27 Meters
